# Supplementary material for: The Effects of Price Rank on Clicks and Conversions in Product List Advertising on Online Retail Platforms
Source: Atypon-hosted journal article supplement (doi:10.1287/isre.2021.1039), 2021-10-01
Supplement: isre.2021.1039.sm1.docx [file isre.2021.1039.sm1.docx]

**Web Appendix A. Complementary Tables**

**TABLE A1**

**Review of Selected Prior Research and the Contributions of this Study**

**TABLE A1 (Cont')**

**Review of Selected Prior Research and the Contributions of this Study**

**TABLE A2**

**Selected Studies of Product Pricing as Signals**

**TABLE A3**

**Variables, Definitions, and Operationalizations**

**TABLE A4**

**Descriptive Statistics**

Notes. The summary statistics are calculated with variables before standardization.

**TABLE A5**

**Model Comparison**

**TABLE A6**

**Estimation Results: LIV Parameters**

**TABLE A7**

**Unobserved Heterogeneity Estimates**

**TABLE A8**

**Estimated Variance and Covariance Matrix**

**TABLE A9**

**Study 2: Summary Statistics**

**Web Appendix B. Complementary Figures**

**FIGURE B1**

**An Example of Search Result Page**

Notes. Sponsored advertisements are vertically listed (within the red rectangle) in the separate column with organic results.

**FIGURE B2**

**Example Search Advertisements**

**FIGURE B3**

**Example Product Page**

**Web Appendix C. The MCMC Algorithm**

We ran the MCMC chain for 80,000 iterations and used every 40th of the last 40,000 iterations to compute the mean and standard deviation of the posterior distribution of the model parameters in the application presented in the paper. We report below the MCMC algorithm for the simultaneous model of click-through rate, conversion rate, and price rank.

As specific, we define

*Step 1*. Draw and

The likelihood function of the number of clicks *nij* and number of purchases *mij* is

,

where and

We use Metropolis-Hastings algorithm with a random walk chain to generate draws of . Let denote the previous draw; then the next draw is given by

,

with the accepting probability given by

is a draw from the density MVN ().

*Step 2*. Draw

Then *a* ~ MVN(*A, B*)

*Step 3*. Draw .

Then

*Step 4*. Draw

,

, ,

,

, ,

,

,

Then,

*Step 5*. Draw

The likelihood function is

,

where and

We use Metropolis-Hastings algorithm with a random walk chain to generate draws of . Let denote the previous draw; then the next draw is given by

with the accepting probability given by

is a draw from the density MVN ().

*Step 6*. Draw , similar to step 5.

*Step 7*. Draw and .

Let ,

then ;

Let ,

then ;

Let ,

then ;

Let ,

then .

*Step 8*. Draw

Then ~ MVN (*A, B*)

*Step 9*. Draw ω

,

where , , and

Then,

*Step 10.* Draw , similar to step 8.

*Step 11*. Draw , similar to step 8.

*Step 12*. Draw , similar to step 8.

*Step13*. Draw 𝜆

***P1×n*** is a vector that contains the probability {,,…,}, and . is the likelihood function evaluated at .

Then, 𝜆 ~ Categorical (***P1×n***)

*Step14*. Draw 𝜋

𝜋| 𝜆 ~ Dirichlet (1+*K1*, 1+*K2*, … , 1+*Kn*), and , *k*=1,2,…,n

**Web Appendix D. Latent Instrumental Variable**

The instrumental variable (IV) method has been widely adopted in econometrics as most of the observations suffer from certain endogeneity issues. A crucial assumption of the ordinary least squares (OLS) approach in estimating the regression model is that the exogenous explanatory variables X and the error term ε are uncorrelated. Otherwise, when X is correlated with ε, X is said to be endogenous, and the estimator will be biased, inconsistent, and inefficient, and thus lose all features that make it preferable over other estimators. IVs were pioneered to overcome this issue in a variety of contexts. Usually, there are three potential causes of endogeneity: omitted variables, self-selection, and simultaneity.

A valid instrumental variable needs to meet the exclusion restriction. That is, for the instrumental variable Z, 1) Z has a casual effect on X, 2) Z affects the outcome variable Y only through X (Z does not have a direct influence on Y conditioning on other covariates), and 3) there is no confounding for the effect of Z on Y. Often times, without careful experiment design and exogenous manipulation, it is not easy to find instrumental variables that perfectly address the endogeneity issues. Researchers often tend to use weak instrumental variables, which refers to the instrumental variables that are only marginally valid. It could be that the instrumental variable Z is poorly correlated with the endogenous explanatory variables X, or the instrumental variable Z weakly affects the outcome variable Y. Prior literature documents that using the weak instrumental variables may possibly be more biased, more inconsistent, and exhibit lower precision than the original endogenous estimates (e.g., Bound et al. 1995).

The latent instrumental variable (hereafter LIV) approach proposed by Ebbes et al. (2005) attempts to solve these issues when no valid instrumental variables are available. The LIV approach utilizes a latent variable, as instrumental variables, to estimate regression parameters when endogeneity is present. The LIV usually consists of two empirically determined vectors: the vector of fixed values (i.e., categorical means) and the vector of probability (i.e., categorical probability). The LIV approach decomposes the endogenous explanatory variable into an exogenous part and an endogenous part, where the exogenous part is an unobserved discrete variable (i.e., the LIV) and the endogenous part is included in the error term. That is, for an endogenous explanatory variable X, we have:

1. , and
2. ,

where is the exogenous part: *π*is the probability vector (*π1, π2, …, πn*), that the *c*th (c = 1, 2, …, n) latent category fits the observation and ; *ω* is an n-dimensional vector containing the latent category means. The number of latent categories should be empirically determined. In addition, is the endogenous part, so that cor(τ, ε) ≠ 0. Therefore, the endogeneity part, cor(X, ε), could be captured by cor(τ, ε), and the cor(ω, ε)=0. By simultaneously estimate the two equations, we could identify the estimated coefficients as the endogeneity will be captured by the estimated covariance. Hence observed IVs are not required. Interestingly, ‘optimal’ IVs are estimated from the data, and endogeneity can be tested as well.

Ebbes et al. (2005) suggest the LIV is most effective for the bimodal distributions and the skewed distribution, and the lowest power for the unimodal distributions. If the instrument has a bimodal or a skewed distribution, the two groups imposed on the endogenous X by the simple LIV model are an adequate representation, allowing for precise LIV estimates. That’s to say, the LIV has the best performance if the estimated LIV categorical means are well separated, and the estimated probabilities should be equally distributed (i.e., bimodal).

**Web Appendix E. Robustness Checks**

To check the robustness of results, we conducted additional tests and the results are reported in Table E1:

*Alternative predictors*. The price rank measure unfortunately does not control for the distance across the prices, so as an alternative measure, we divide the price range in the display list into five intervals and use the price interval as an alternative measure. The results are consistent with our main estimation results, and we keep the current predictor for the better model fit.

*Lagged differences as instrumental variables*. In the main model, we adopt previous observations of key variables as instrumental variables to address endogeneity concerns. To verify the validity of lagged terms as instrumental, we replace them with lagged differences and run a robustness check. The results are consistent with our main estimation results, and we keep the current setting for the better model fit.

*Price rank among sponsored and organic listings*. Although the sponsored and organic product listings are displayed separately, consumers’ perceptions of the sponsored prices might be affected by the organic listings (Jerath et al. 2014; Yang and Ghose 2010). To examine the potential influences of organic listings on the effects of price rank, calculate price rank among the top 16 listings (i.e., the eight sponsored listings and the first eight organic listings). The estimation results are largely consistent with (though smaller than) the main results.

**TABLE E1**

**Unobserved Heterogeneity Estimates**

**Web Appendix F. Post-Hoc Analysis**

To further investigate the effects of changing price vs. changing price rank, we extend the proposed model by adding the log(*price*), its quadratic term, and their interactions with two keyword characteristics, as well as the random effects. Specifically, we revised the eq 3-5 and eq 7-9 as follows:

(3) = *α0i* + *α1i PriceRankijt* + *α2iPriceRank2ijt* + *α3i* log(*Priceijt*)+ *α4i* log(*Priceijt*)2+ *α5Specificityi* + *α6Popularityi* + *α7DisplayRankijt* + *α8PastSalesjt +α9-15****Xijt***+*+ ηijt.*

(4) .

(5) .

(7) = *β0i* + *β1iPriceRankijt* + *β2iPriceRank2ijt* + *β3i* log(*Priceijt*)+ *β4i* log(*Priceijt*)2+ *β5Specificityi* + *β6Popularityi + β7DisplayRankijt + β8Volumeijt* + *β9Ratingijt* + *β10DiscountRatejt* + *β11-17****Xijt***+ *+ εijt*,

(8) , and

(9) .

The rest of the equations are the same as our original model. The estimated results of the post-hoc model are reported in Table F1.

**TABLE F1**

**Post Hoc Model Estimation Results**

The Post-hoc analysis in Table 3 is calculated based on the estimated results in Table F1 and the values of variables satisfying the conditions. The detailed values of each conditions are: 1) +/-10% price adjustment indicates log(Price)= +/- 0.10; 2) Price rank= 0.25, 0.5, and 0.75 for low, medium and high price rank, respectively; 3) Niche general keywords: Specificity = mean - S.D. and Popularity = mean - S.D.; Popular general keywords: Specificity = mean - S.D. and Popularity = mean + S.D.; Niche specific keywords: Specificity = mean + S.D. and Popularity = mean - S.D.; Popular specific keywords: Specificity = mean + S.D. and Popularity = mean + S.D. The rest of the covariates are taken at the mean.
